# Supplementary material
Source: publisher site journal article supplement (https://www.dovepress.com/article/324056)
Supplement: Supplementary file 1 [file get_supplementary_file.php]

**Supplemental Table 1.** Inter- and intra-assay percentage of the coefficients of variability (%CV) of multiplex ELISA

| Variables | Intra-assay %CV | Inter-assay %CV |  | Variables | Intra-assay %CV | Inter-assay %CV |
| --- | --- | --- | --- | --- | --- | --- |
| Acute phase proteins | | |  | Cytokines and chemokines | | |
| A2M | <15 | <20 |  | Eotaxin | 7.2 | 10.8 |
| Adipsin | <15 | <20 |  | FGF-2 | 2.3 | 4.8 |
| AGP | <15 | <20 |  | Flt3 Ligand | 2.4 | 6.6 |
| CRP | <15 | <20 |  | Fractalkine | 4.5 | 9.4 |
| CXCL4 | <15 | <20 |  | G-CSF | 1.8 | 15.5 |
| Fetuin A | <15 | <20 |  | GM-CSF | 3.1 | 10.1 |
| Fibrinogen | <15 | <20 |  | GRO | 2.1 | 9.2 |
| Haptoglobin | <15 | <20 |  | IFNα2 | 2.4 | 13.3 |
| sL-Selectin | <15 | <20 |  | IFNγ | 1.6 | 12.0 |
| SAP | <15 | <20 |  | IL-1RA | 2.1 | 10.7 |
| vWF | <15 | <20 |  | IL-1α | 3.3 | 12.8 |
| EGF | 2.3 | 5.8 |  | IL-1β | 2.3 | 6.7 |
| Checkpoint protein | | |  | IL-2 | 2.1 | 6.3 |
| BTLA | <5 | <10 |  | IL-3 | 3.4 | 6.1 |
| CD27 | <5 | <10 |  | IL-4 | 2.9 | 14.2 |
| CD28 | <5 | <10 |  | IL-5 | 2.6 | 10.8 |
| CD40 | <5 | <10 |  | IL-6 | 2.0 | 18.3 |
| CD80/B7-1 | <5 | <10 |  | IL-7 | 1.7 | 16.1 |
| CD86/B7-2 | <5 | <10 |  | IL-8 | 1.9 | 3.5 |
| CTLA-4 | <5 | <10 |  | IL-9 | 2.4 | 8.4 |
| GITR | <5 | <10 |  | IL-10 | 1.6 | 16.8 |
| GITRL | <5 | <10 |  | IL-12 (p40) | 2.8 | 12.4 |
| HVEM | <5 | <10 |  | IL-12 (p70) | 2.2 | 16.7 |
| ICOS | <5 | <10 |  | IL-13 | 2.2 | 9.2 |
| LAG-3 | <5 | <10 |  | IL-15 | 2.7 | 8.1 |
| PD-1 | <5 | <10 |  | IL-17A | 2.2 | 7.9 |
| PD-L1 | <5 | <10 |  | IP-10 | 2.6 | 15.3 |
| TIM-3 | <5 | <10 |  | MCP-1 | 1.5 | 7.9 |
| TLR-2 | <5 | <10 |  | MCP-3 | 1.6 | 6.4 |
|  |  |  |  | MDC | 1.6 | 7.2 |
|  |  |  |  | MIP-1α | 1.9 | 14.5 |
|  |  |  |  | MIP-1β | 2.4 | 8.8 |
|  |  |  |  | sCD40L | 3.7 | 18.9 |
|  |  |  |  | TGFα | 4.1 | 9.5 |
|  |  |  |  | TNFα | 2.6 | 13.0 |
|  |  |  |  | TNFβ | 1.6 | 11.4 |
|  |  |  |  | VEGF | 3.7 | 10.4 |

%CV, coefficient of variability
